# Supplementary material for: Anti-Inflammatory Effects of Weigela subsessilis Callus Extract via Suppression of MAPK and NF-κB Signaling
Source: MDPI journal article supplement (doi:10.3390/plants10081635), 2021-08-09
Supplement: s1 [file s1]

# Anti-inflammatory effects of *Weigela subsessilis* callus extract via suppression of MAPK and NF- $\kappa$ B signaling

Hyeon-Ji Lim <sup>1</sup>, Eun Yee Jie <sup>2</sup>, In-Sun Park <sup>1</sup>, Sang-Jun Kim <sup>1</sup>, Woo Seok Ahn <sup>2</sup>, Seung-Il Jeong <sup>1</sup>, Suk Weon Kim <sup>2,\*</sup> and Chan-Hun Jung <sup>1,\*</sup>

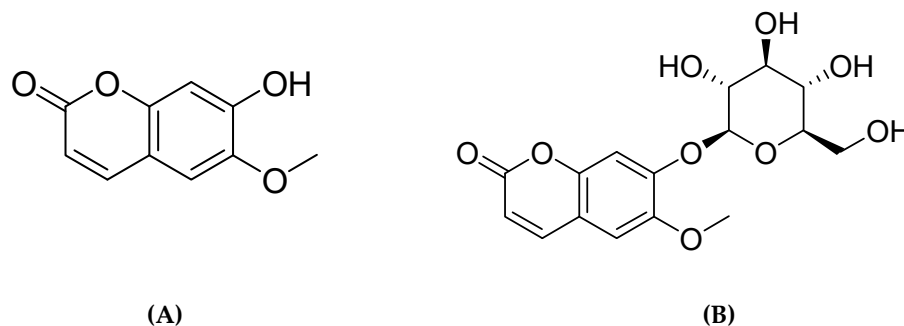

**Figure S1.** Chemical structure of standard compounds. (A) Scopolin. (B) Scopeletin.

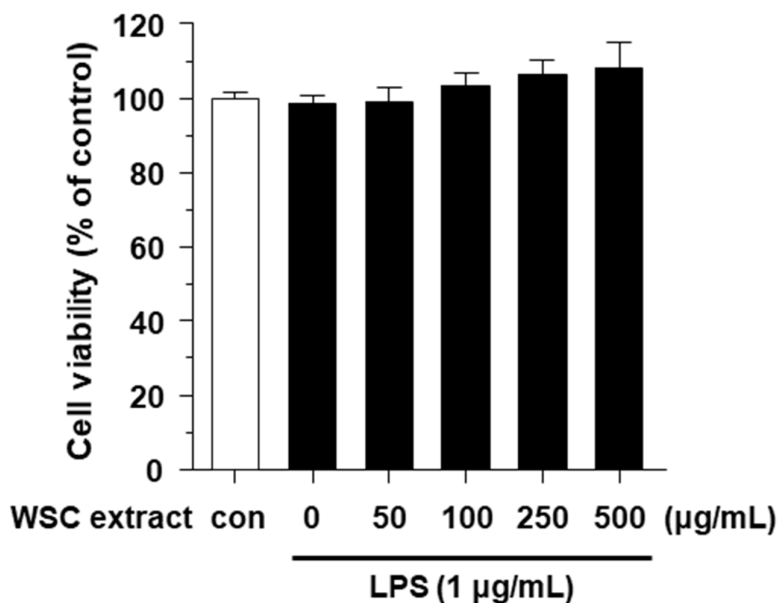

**Figure S2.** Cytotoxicity of the WSC extract and LPS. Cell viability was measured after treatment of both 1 µg of LPS and indicated concentration of WSC extract in RAW264.7 cells by dimethylthiazol-diphenyltetrazolium bromide assay. Values are expressed as mean  $\pm$  SD of three independent experiments.
